# Supplementary material for: Influence of M/A substitution on material properties of intermetallic compounds MSn2(M = Fe, and Co; A = Li, and Na): a first-principles study
Source: Royal Society of Chemistry journal article supplement (doi:10.1039/d0nj04537c), 2020-01-01
Supplement: d0nj04537c1.pdf [file d0nj04537c1.pdf]

## Supplementary Information – Influence of M/A substitution on material properties of intermetallic compounds MSn<sub>2</sub> (M = Fe, Co; A = Li, Na): A first-principles study

Chol-Jun Yu<sup>a,\*</sup>, Un-Song Hwang<sup>a</sup>, Yong-Chol Pak<sup>a</sup>, Kyonga Rim<sup>a</sup>, Chol Ryu<sup>a</sup>,  
 Chon-Ryong Mun<sup>a</sup>, Un-Gi Jong<sup>a,b</sup>

<sup>a</sup>Chair of Computational Materials Design, Faculty of Materials Science, Kim Il Sung University,  
 Ryongnam-Dong, Taesong District, Pyongyang, Democratic People's Republic of Korea

<sup>b</sup>Natural Science Centre, Kim Il Sung University, Ryongnam-Dong, Taesong District,  
 Pyongyang, Democratic People's Republic of Korea

Table S1. Lattice constants and their relative error, total energy and total energy difference of alloy compounds with different magnetic states such as ferromagnetic (FM), non-magnetic (NM) and anti-ferromagnetic (AFM) states. For the case of CoSn<sub>2</sub>, only NM state was observed although initial magnetization were differently imposed.

|                   | Mag. state | <i>a</i> (Å) | error (%) | <i>c</i> (Å) | error (%) | <i>E</i> <sub>tot</sub> (Ry) | Δ <i>E</i> (Ry) |
|-------------------|------------|--------------|-----------|--------------|-----------|------------------------------|-----------------|
| FeSn <sub>2</sub> | FM         | 6.3430       | -0.294    | 5.4759       | 0.324     | -2304.670759                 | 0.013           |
|                   | NM         | 6.3879       | -2.222    | 5.4386       | 2.226     | -2304.602940                 | 0.081           |
|                   | AFM        | 6.5333       | 0.003     | 5.3271       | 0.130     | -2304.683929                 | 0.000           |
| CoSn <sub>2</sub> | NM         | 6.3442       | -0.275    | 5.4723       | 0.258     | -2489.977319                 |                 |

Table S2. Magnetic moment of transition atom (M = Fe or Co), alkali atom (A = Li or Na) and Sn atom, and total magnetization of alloy compounds with different magnetic states in μ<sub>B</sub> unit.

|                     | Mag. state | μ <sub>M1</sub> | μ <sub>M2</sub> | μ <sub>A</sub> | μ <sub>Sn</sub> | μ <sub>tot</sub> |
|---------------------|------------|-----------------|-----------------|----------------|-----------------|------------------|
| FeSn <sub>2</sub>   | FM         | 1.72            | 1.72            | -              | 0.00            | 6.00             |
|                     | NM         | 0.00            | 0.00            | -              | 0.00            | 0.00             |
|                     | AFM        | 1.89            | -1.89           | -              | 0.00            | 0.00             |
| FeLiSn <sub>2</sub> | FM         | 2.30, 1.64      | 0.04            | 0.00           | -0.03           | 3.40             |
| FeNaSn <sub>2</sub> | FM         | 2.38, 1.79      | -1.78           | 0.02           | -0.01           | 2.29             |
| CoSn <sub>2</sub>   | NM         | 0.00            | 0.00            | -              | 0.00            | 0.00             |
| CoLiSn <sub>2</sub> | NM         | 0.00            | 0.00            | 0.00           | 0.00            | 0.00             |
| CoNaSn <sub>2</sub> | NM         | 0.00            | 0.00            | 0.00           | 0.00            | 0.00             |

Table S3. Inter-atomic distance in Å unit for the inter-metallics. M = Fe or Co and A = Li or Na.

|                     | M-Sn  | M-M   | Sn-Sn | M-A   | Sn-A  |
|---------------------|-------|-------|-------|-------|-------|
| FeSn <sub>2</sub>   | 2.787 | 2.663 | 3.117 |       |       |
| FeLiSn <sub>2</sub> | 2.806 | 2.736 | 3.078 | 2.736 | 2.855 |
| FeNaSn <sub>2</sub> | 2.843 | 2.837 | 3.108 | 2.837 | 2.994 |
| CoSn <sub>2</sub>   | 2.731 | 2.736 | 3.116 |       |       |
| CoLiSn <sub>2</sub> | 2.778 | 2.798 | 3.111 | 2.798 | 2.856 |
| CoNaSn <sub>2</sub> | 2.802 | 2.869 | 3.124 | 2.869 | 2.984 |

\*Corresponding author: Chol-Jun Yu, Email: cj.yu@ryongnamsan.edu.kp

Table S4. Elastic compliance constants in 1/GPa unit.

|                                                     | $S_{11}$ | $S_{12}$ | $S_{13}$ | $S_{33}$ | $S_{44}$ | $S_{66}$ |
|-----------------------------------------------------|----------|----------|----------|----------|----------|----------|
| FeSn <sub>2</sub>                                   | 0.00588  | -0.00063 | -0.00216 | 0.00738  | 0.01872  | 0.01444  |
| Fe <sub>3/4</sub> Li <sub>1/4</sub> Sn <sub>2</sub> | 0.00692  | -0.00123 | -0.00183 | 0.00824  | 0.02211  | 0.01822  |
| Fe <sub>3/4</sub> Na <sub>1/4</sub> Sn <sub>2</sub> | 0.00794  | -0.00177 | -0.00203 | 0.00941  | 0.02348  | 0.01961  |
| CoSn <sub>2</sub>                                   | 0.00557  | -0.00105 | -0.00138 | 0.00611  | 0.02343  | 0.01492  |
| Co <sub>3/4</sub> Li <sub>1/4</sub> Sn <sub>2</sub> | 0.00757  | -0.00127 | -0.00214 | 0.00911  | 0.03558  | 0.02173  |
| Co <sub>3/4</sub> Na <sub>1/4</sub> Sn <sub>2</sub> | 0.00855  | -0.00147 | -0.00275 | 0.01142  | 0.03901  | 0.02521  |

Table S5. Elastic moduli within the Reuss ( $B_R$  and  $G_R$ ) and Voigt ( $B_V$  and  $G_V$ ) approximation in GPa unit, and longitudinal ( $v_l$ ) and transverse ( $v_t$ ) elastic wave velocities in m/s unit.

|                                                     | $B_R$   | $G_R$  | $B_V$   | $G_V$  | $v_l$     | $v_t$     |
|-----------------------------------------------------|---------|--------|---------|--------|-----------|-----------|
| FeSn <sub>2</sub>                                   | 108.271 | 59.530 | 108.278 | 61.047 | 4693.0629 | 2652.9847 |
| Fe <sub>3/4</sub> Li <sub>1/4</sub> Sn <sub>2</sub> | 81.486  | 50.807 | 81.722  | 51.533 | 4367.6808 | 2552.4578 |
| Fe <sub>3/4</sub> Na <sub>1/4</sub> Sn <sub>2</sub> | 73.489  | 46.264 | 73.989  | 46.653 | 4261.6229 | 2493.7009 |
| CoSn <sub>2</sub>                                   | 104.087 | 55.637 | 104.144 | 59.067 | 4495.3979 | 2533.3857 |
| Co <sub>3/4</sub> Li <sub>1/4</sub> Sn <sub>2</sub> | 76.015  | 37.706 | 76.144  | 40.847 | 4003.8153 | 2213.9901 |
| Co <sub>3/4</sub> Na <sub>1/4</sub> Sn <sub>2</sub> | 68.549  | 33.211 | 69.122  | 35.553 | 3859.7698 | 2113.4270 |

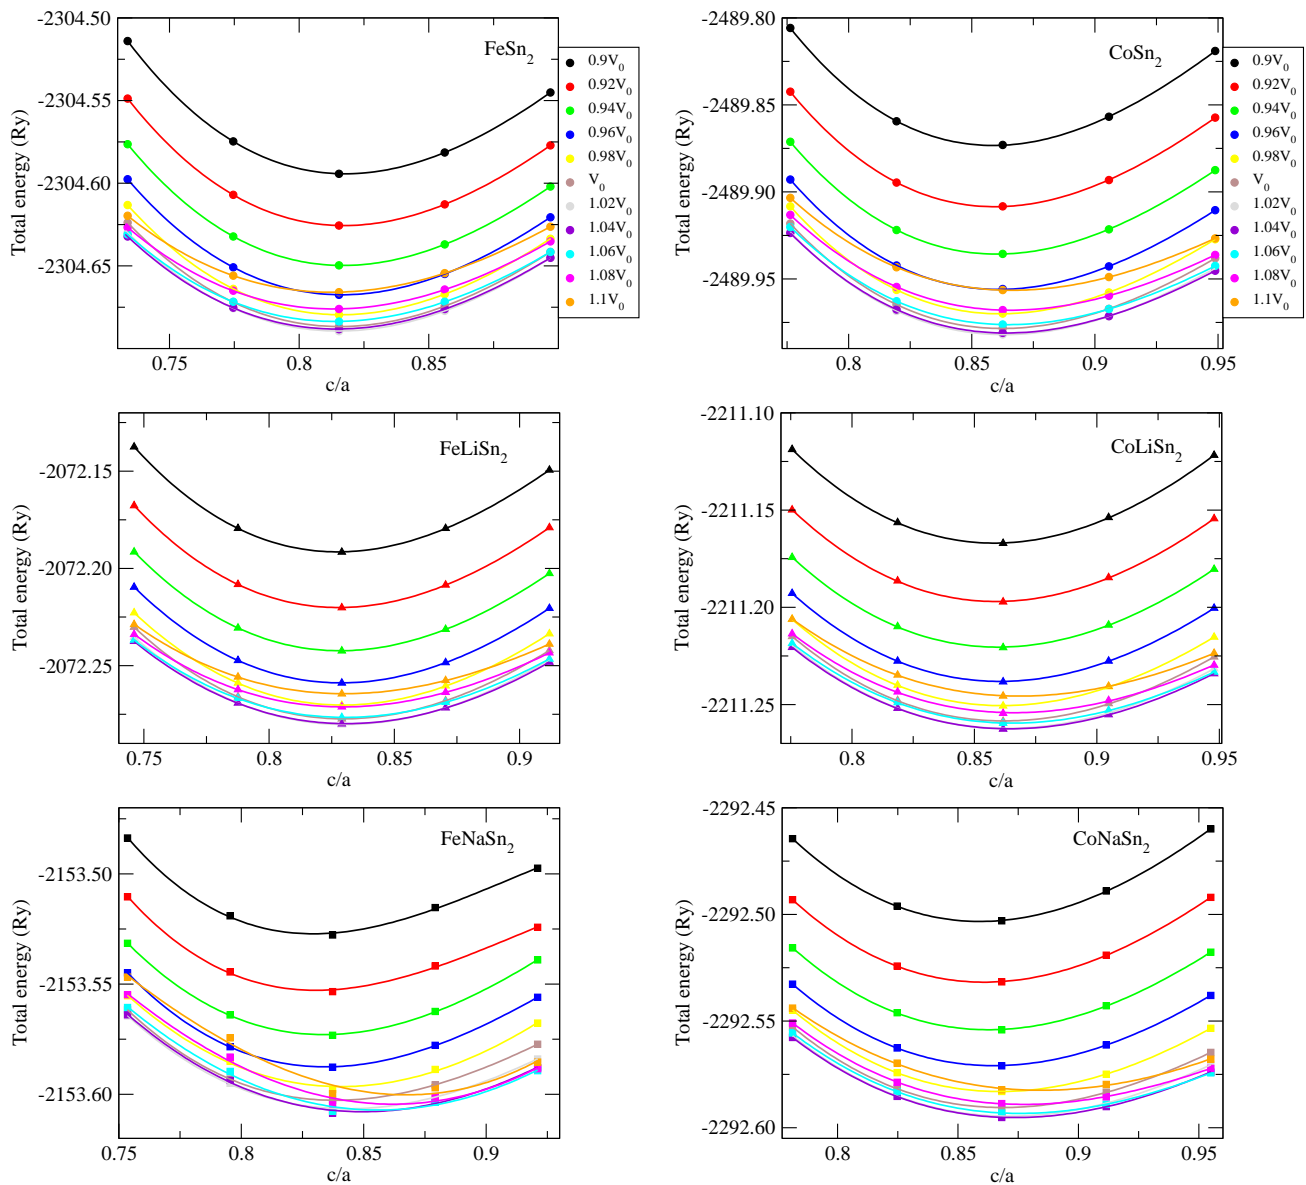

Figure S1. Total energy as a function of tetragonal lattice constants ratio  $c/a$  with gradually varying the cell volume from  $0.9V_0$  to  $1.1V_0$  in  $\text{FeSn}_2$ ,  $\text{Fe}_{3/4}\text{Li}_{1/4}\text{Sn}_2$ ,  $\text{Fe}_{3/4}\text{Na}_{1/4}\text{Sn}_2$ ,  $\text{CoSn}_2$ ,  $\text{Co}_{3/4}\text{Li}_{1/4}\text{Sn}_2$  and  $\text{Co}_{3/4}\text{Na}_{1/4}\text{Sn}_2$  in tetragonal phase.

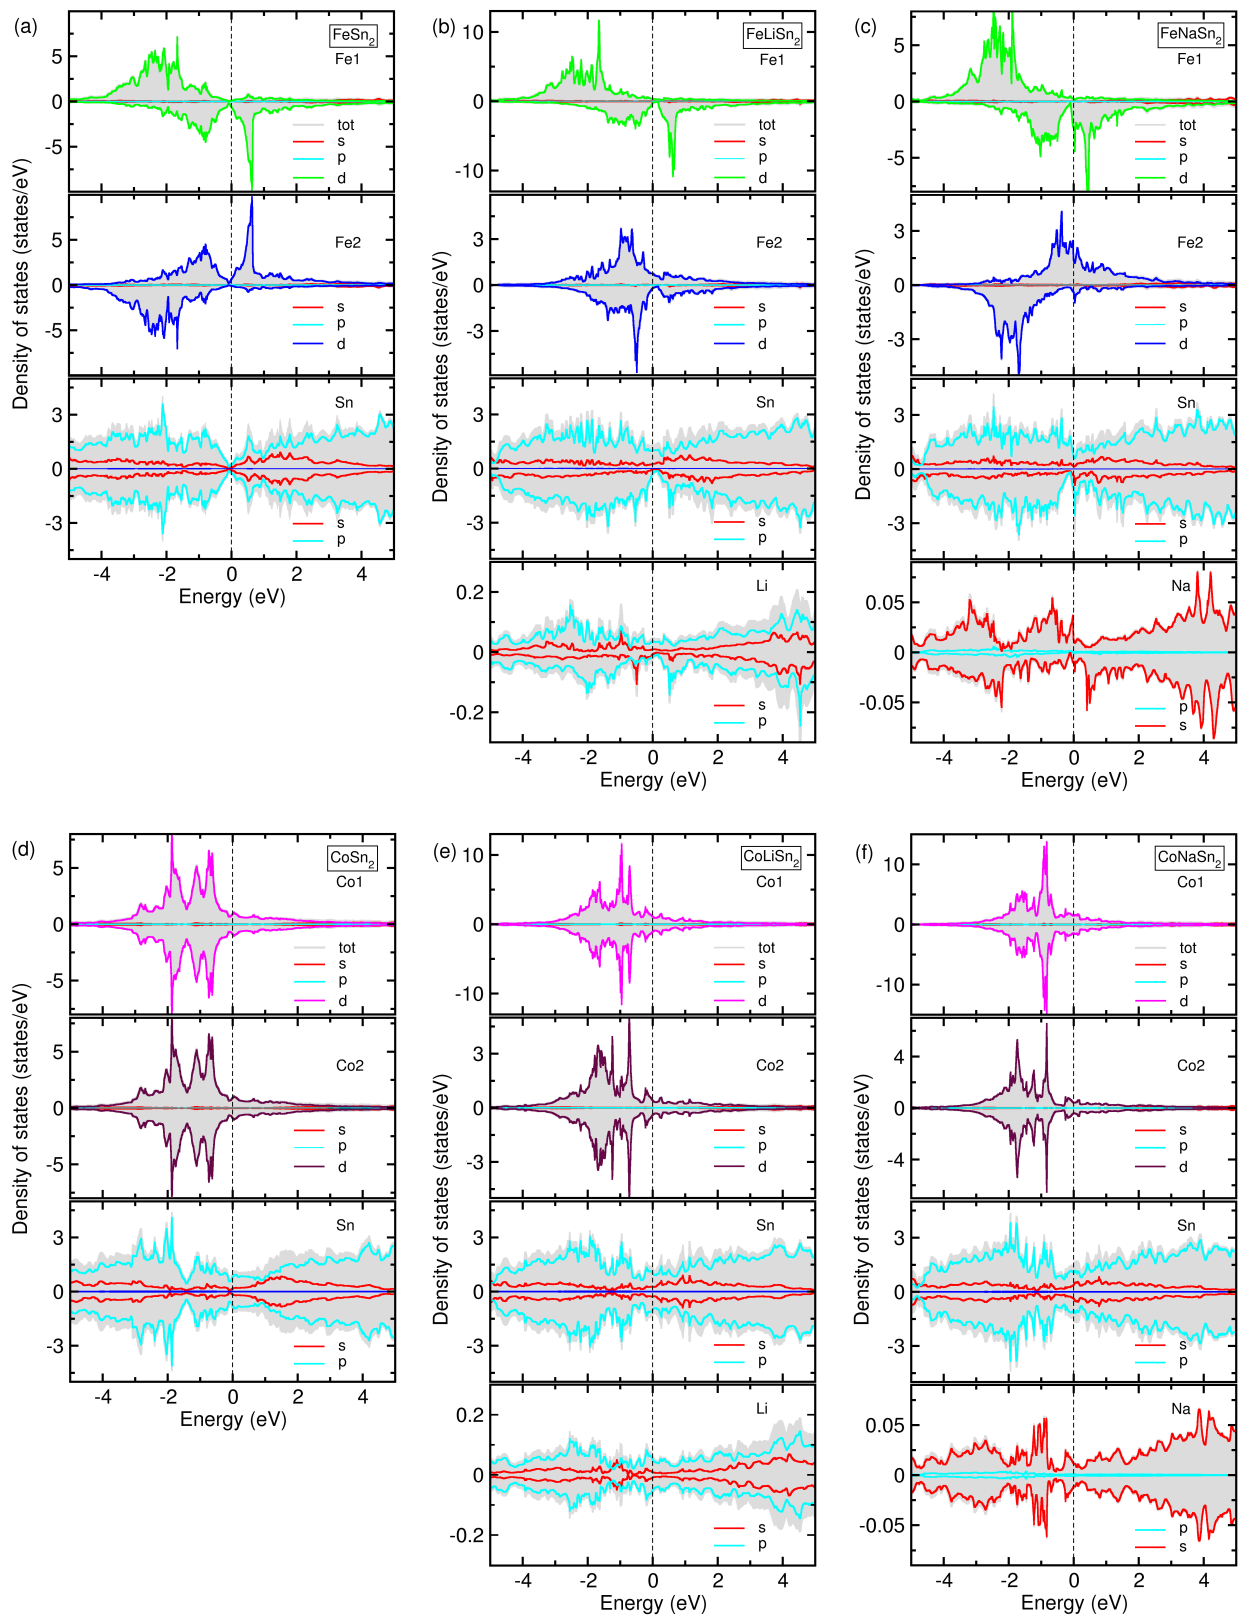

Figure S2. Partial density of states in (a)  $\text{FeSn}_2$ , (b)  $\text{FeLiSn}_2$ , (c)  $\text{FeNaSn}_2$ , (d)  $\text{CoSn}_2$ , (e)  $\text{CoLiSn}_2$  and (f)  $\text{CoNaSn}_2$ . The Fermi energy is set to zero as denoted by vertical dotted line.

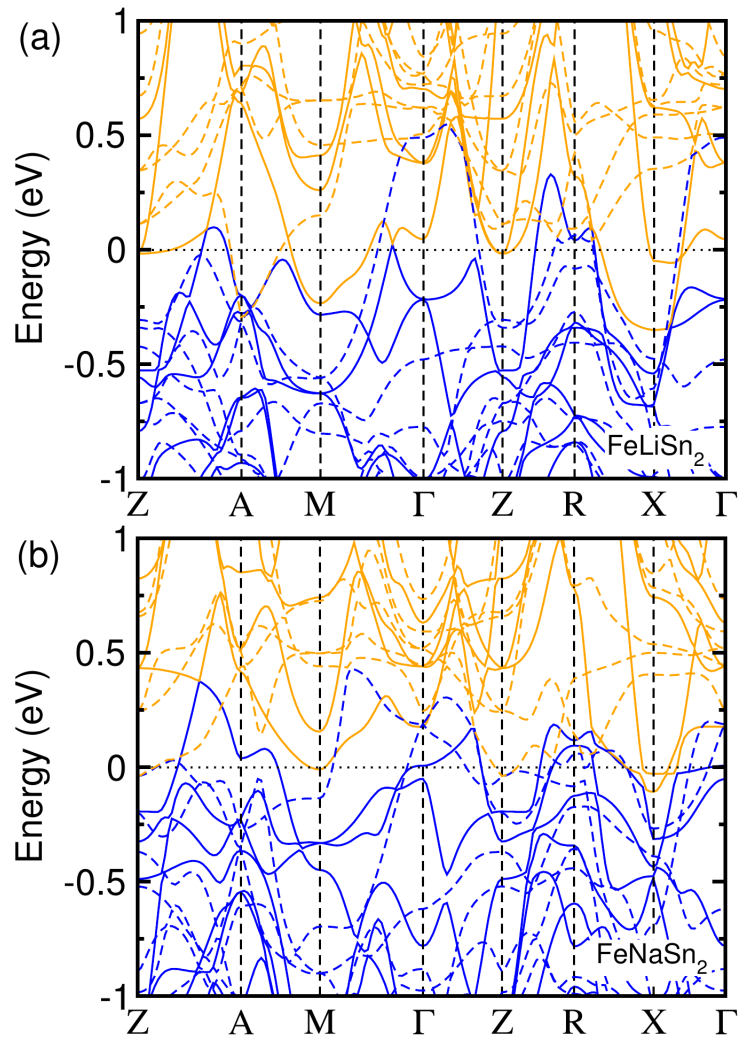

Figure S3. Both spin-up and spin-down energy band structures of (a)  $\text{Fe}_{3/4}\text{Li}_{1/4}\text{Sn}_2$  and (b)  $\text{Fe}_{3/4}\text{Na}_{1/4}\text{Sn}_2$ . Blue and orange colors denote the occupied and empty spin-up bands, and dashed lines indicate the corresponding spin-down bands.

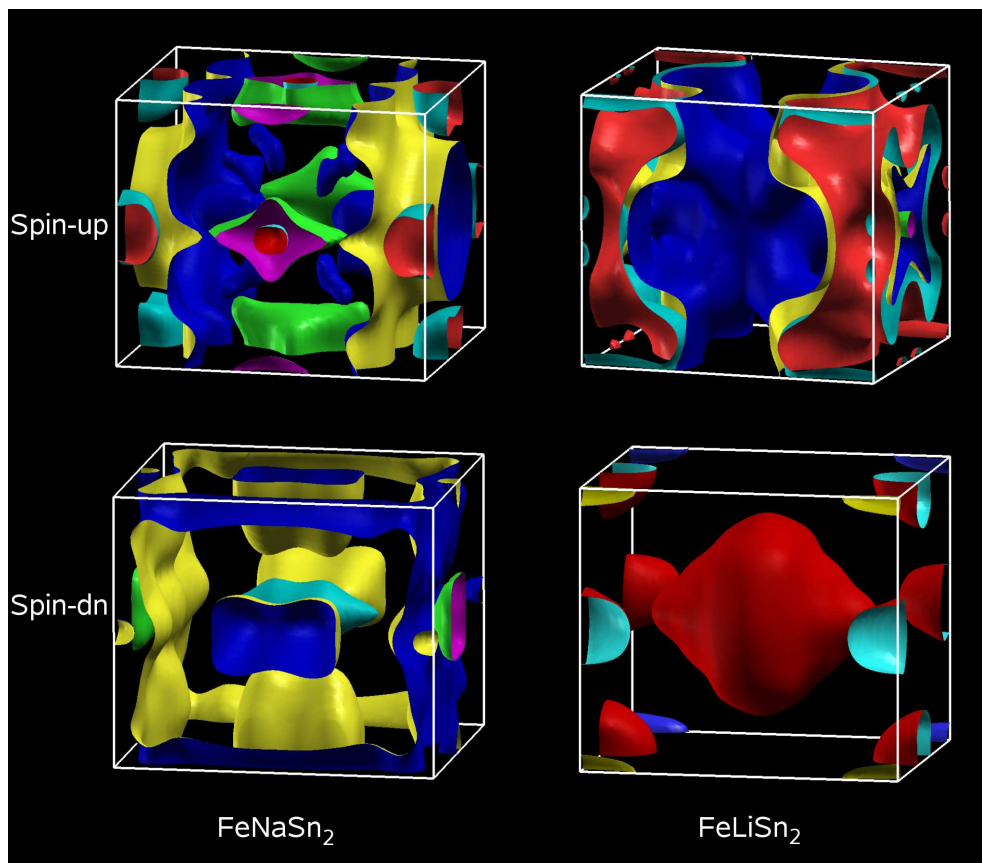

Figure S4. Fermi surface for spin-up and spin-down electronic energy bands of  $\text{Fe}_{3/4}\text{Na}_{1/4}\text{Sn}_2$  and  $\text{Fe}_{3/4}\text{Li}_{1/4}\text{Sn}_2$ .
